# Supplementary material
Source: PubMed Central journal article supplement (PMC3301989)
Supplement: supp_jn.111.154427_nut154427-ST1-ST3.pdf [file supp_jn.111.154427_nut154427-ST1-ST3.pdf]

## Online supporting Material

**Supplemental Table 1.** Composition of pig milk replacer formula used in this study<sup>1</sup>.

| <b>Component</b>        |                                               | <b>Amount</b>      |
|-------------------------|-----------------------------------------------|--------------------|
|                         |                                               | <i>/ kg powder</i> |
| Crude protein, <i>g</i> |                                               | 250                |
| Crude fat, <i>g</i>     |                                               | 130                |
| Lactose, <i>g</i>       |                                               | 410                |
| Ash, <i>g</i>           |                                               | 93.8               |
| Energy, <i>kcal</i>     |                                               | 3,810              |
| Amino Acids             | Lysine, <i>g</i>                              | 23.9               |
|                         | DL-Methionine, <i>g</i>                       | 5.80               |
| Vitamins                | Retinyl Acetate, <i>mg</i>                    | 1.35               |
|                         | Pyridoxine Hydrochloride, <i>mg</i>           | 5.74               |
|                         | Cyanocobalamin, $\mu$ <i>g</i>                | 73.8               |
|                         | Ascorbic Acid, <i>mg</i>                      | 89.4               |
|                         | D,L alpha-tocopherol acetate, $\mu$ <i>g</i>  | 15.0               |
|                         | Menadione Sodium Bisulfite Complex, <i>mg</i> | 3.83               |
|                         | Cholecalciferol, $\mu$ <i>g</i>               | 7.50               |
|                         | Thiamine Mononitrate, <i>mg</i>               | 5.55               |
|                         | Riboflavin, <i>mg</i>                         | 23.2               |
|                         | Niacinamide, <i>mg</i>                        | 30.7               |
|                         | Folic acid, <i>mg</i>                         | 2.90               |
|                         | Calcium Pantothenate, <i>mg</i>               | 67.7               |
|                         | Biotin, <i>mg</i>                             | 0.83               |
|                         | Choline Chloride, <i>g</i>                    | 2.34               |
| Mineral                 | Calcium, <i>g</i>                             | 10.5               |
|                         | Phosphorus, <i>g</i>                          | 10.1               |
|                         | Sodium, <i>g</i>                              | 9.50               |
|                         | Magnesium, <i>g</i>                           | 1.00               |
|                         | Potassium, <i>g</i>                           | 21.9               |
|                         | Cobalt, <i>mg</i>                             | 1.05               |
|                         | Copper, <i>mg</i>                             | 12.0               |
|                         | Iron, <i>mg</i>                               | 105                |
|                         | Manganese, <i>mg</i>                          | 29.5               |
|                         | Zinc, <i>mg</i>                               | 122                |
|                         | Selenium, <i>mg</i>                           | 0.30               |

<sup>1</sup> Advance Liqui-wean, Milk Specialties, Dundee IL

**Supplemental Table 2.** Real time PCR primers used in this study.

| <b>Target group</b>             | <b>Primer</b> | <b>Sequence (5'-3')</b>   | <b>Annealing temperature, °C</b> | <b>Reference</b> |
|---------------------------------|---------------|---------------------------|----------------------------------|------------------|
| All bacteria                    | Uni331F       | TCCTACGGGAGGCAGCAGT       | 60                               | 28               |
|                                 | Uni797R       | GGACTACCAGGGTATCTATCCTGTT |                                  |                  |
| <i>Clostridium</i> cluster IV   | Sg-Clept-F    | GCACAAGCAGTGGAGT          | 50                               | 31               |
|                                 | Sg-Clept-R3   | CTTCCTCCGTTTTGTCAA        |                                  |                  |
| <i>Clostridium</i> cluster XIVa | g-Ccoc-F      | AAATGACGGTACCTGACTAA      | 50                               | 31               |
|                                 | g-Ccoc-R      | CTTTGAGTTTCATTCTTGCGAA    |                                  |                  |
| <i>Bifidobacterium</i> spp.     | Bif164F       | GGGTGGTAATGCCGGATG        | 60                               | 30               |
|                                 | Bif662R       | CCACCGTTACACCGGGAA        |                                  |                  |
| <i>Lactobacillus</i> spp.       | LacF          | AGCAGTAGGGAATCTTCCA       | 58                               | 29               |
|                                 | LacR          | CACCGCTACACATGGAG         |                                  |                  |
| DGGE Band_5                     | BV-1          | GCATCATGAGTCCGCATGTTC     | 55                               | 32               |
|                                 | BV-2          | TCCATACCCGACTTTATTCCTT    |                                  |                  |

**Supplemental Table 3.** The composition of isolated human milk oligosaccharides used in this study<sup>1-3</sup>.

| <b>HMO</b>                 | <b>of total HMO, %</b> |
|----------------------------|------------------------|
| Fucosylated                | 56.1                   |
| LNT/LNnT                   | 16.1                   |
| LNFP I, III, V             | 8.87                   |
| MFLNH III/MFLNH I          | 6.69                   |
| 2'FL                       | 5.83                   |
| LNH/(p-LNnH)               | 4.40                   |
| MFpLNH IV                  | 3.27                   |
| LNnH                       | 2.76                   |
| DFLNHa                     | 2.13                   |
| DFpLNH II                  | 1.87                   |
| IFLNH 3                    | 1.76                   |
| DFLNHb                     | 1.76                   |
| Sialylated                 | 31.6                   |
| LSTc/LSTb                  | 9.30                   |
| 6'SL                       | 2.09                   |
| MSLNnH                     | 2.04                   |
| SLNH                       | 1.77                   |
| LSTa                       | 1.07                   |
| 3'SL                       | 1.95                   |
| Fucosylated and Sialylated | 12.4                   |
| FS-LNnH I                  | 4.38                   |
| F-LSTc                     | 2.31                   |
| FS-LNH III                 | 2.17                   |

<sup>1</sup> Only the major oligosaccharides that account for more than 1% of total HMO are listed.

<sup>2</sup> As determined by HPLC-Chip TOF MS (17).

<sup>3</sup> Abbreviations: DFLNH: Difucosyllacto-*N*-hexaose; DFpLNH: Difucosyl-para-lacto-*N*-hexaose; 2'FL: 2'-Fucosyllactose; FS-LNH: Fucosyl-sialyl-lacto-*N*-hexaoses; FS-LNnH: Fucosyl-sialyl-lacto-*N*-neo-hexaoses; F-LST: Fucosyl-sialyllacto-*N*-tetraose; HMO: human milk oligosaccharides; IFLNH 3: isomer 3 fucosyl-paralacto-*N*-hexaose; LNFP: Lacto-*N*-fucopentaose; LNH: lacto-*N*-hexaose; LNnH: Lacto-*N*-neo-hexaose; LNnT: Lacto-*N*-neotetraose; LNT: Lacto-*N*-tetraose; LST: Sialyllacto-*N*-tetraose; MFLNH: Monofucosyllacto-*N*-hexaose; MFpLNH: Monofucosyl-para-lacto-*N*-hexaose; MSLNnH: Monosialyllacto-*N*-neo-hexaose; 3'SL: 3'-Sialylactose; 6'SL: 6'-Sialylactose; SLNH: *sialylated* lacto-*N*-hexaose.
